# Supplementary material
Source: ML conference proceedings conference paper supplement (https://proceedings.neurips.cc/paper_files/paper/2022/hash/afe37ac3ce109cd33a23a6b3ed0cfc21-Abstract.html)
Supplement: Supplementary file 1 [file afe37ac3ce109cd33a23a6b3ed0cfc21-Supplemental-Conference.zip]

Archive with 2 entries (2 files):
- src.zip
- Supplementary_Material__1__camera.pdf
